# Supplementary material for: Age-specific effects of weight-based body size on fracture risk in later life: a lifecourse Mendelian randomisation study
Source: Springer Nature journal article supplement (doi:10.1007/s10654-023-00986-6), 2023-05-03
Supplement: MOESM1 [file 25314182]

Full title: Age-specific effects of weight-based body size on fracture risk in later life: A lifecourse Mendelian randomisation study

Running title: Weight-based body size and fracture risk

Grace M. Power, MSc.,<sup>1\*</sup> Jon Tobias, PhD.,<sup>1,2</sup> Timothy M. Frayling, PhD.,<sup>3</sup> Jess Tyrrell, PhD.,<sup>3</sup> April Hartley, PhD.,<sup>2</sup> Jon Heron, PhD.,<sup>1</sup> George Davey Smith, FRS.,<sup>1,4¶</sup> Tom G. Richardson, PhD.,<sup>1¶</sup>

<sup>1</sup> *MRC Integrative Epidemiology Unit, University of Bristol, Bristol, UK.*

<sup>2</sup> *Musculoskeletal Research Unit, Translational Health Sciences, Bristol Medical School, University of Bristol, Bristol, UK.*

<sup>3</sup> *Genetics of Complex Traits, College of Medicine and Health, University of Exeter, Exeter, UK.*

<sup>4</sup> *NIHR Bristol Biomedical Research Centre Bristol, University Hospitals Bristol and Weston NHS Foundation Trust, University of Bristol, Bristol, UK.*

¶ These authors contributed equally to this work.

\* Corresponding author: Grace M Power - [grace.power@bristol.ac.uk](mailto:grace.power@bristol.ac.uk) - +44 (0)117 331 0098

Population Health Sciences, Bristol Medical School, University of Bristol, Oakfield House, Oakfield Grove, Bristol, BS8 2BN, United Kingdom

S1 Table: A summary of the genetic datasets used in this study

| Variable                                    | Trait                       | Sample size | Year | First author  | PubMed ID | Ancestry |
|---------------------------------------------|-----------------------------|-------------|------|---------------|-----------|----------|
| Exposure                                    | Childhood body size         | 453169      | 2020 | Richardson TG | 32376654  | European |
| Exposure                                    | Adult body size             | 453169      | 2020 | Richardson TG | 32376654  | European |
| Exposure                                    | Birthweight                 | 261932      | 2021 | NA            | NA        | European |
| Mediator                                    | Vitamin D                   | 449913      | 2021 | NA            | NA        | European |
| Mediator                                    | Calcium                     | 432151      | 2021 | NA            | NA        | European |
| Mediator                                    | eBMD                        | 278932      | 2021 | NA            | NA        | European |
| Mediator                                    | Bioavailable testosterone   | 414074      | 2021 | NA            | NA        | European |
| Mediator                                    | Total testosterone          | 364411      | 2021 | NA            | NA        | European |
| Mediator                                    | SHBG                        | 428137      | 2021 | NA            | NA        | European |
| Outcome                                     | Fracture risk in later life | 416795      | 2018 | Morris JA     | 30598549  | European |
| Exposure and outcome (Sensitivity analysis) | Fat mass                    | 453957      | 2021 | NA            | NA        | European |
| Exposure and outcome (Sensitivity analysis) | Fat-free mass               | 454669      | 2021 | NA            | NA        | European |

S2 Table: Input for web application to calculate expected bias and Type 1 error rate under the null for genetically proxied childhood body size and fracture risk in later life

| Field                                                                                                      | Input   |
|------------------------------------------------------------------------------------------------------------|---------|
| Outcome is:                                                                                                | Binary  |
| Coefficient of determination (R2) of risk factor on genetic variants:                                      | 0.6     |
| Sample size for exposure:                                                                                  | 49109   |
| Sample size for outcome:                                                                                   | 413809  |
| Number of instruments:                                                                                     | 313     |
| Bias of the observational estimate (OLS estimate):                                                         | 0.8-0.9 |
| [For binary outcome only] Proportion of cases (if 1:1 ratio of cases to controls, then proportion is 0.5): | 0.106   |

S3 Table: Output from web application to calculate expected bias and Type 1 error rate under the null for genetically proxied childhood body size and fracture risk in later life

| Using specified value of concentration parameter |       |                   | Using conservative value of concentration parameter |       |                   |
|--------------------------------------------------|-------|-------------------|-----------------------------------------------------|-------|-------------------|
| Overlap proportion                               | Bias  | Type 1 error rate | Overlap proportion                                  | Bias  | Type 1 error rate |
| 0.0                                              | 0.000 | 0.05              | 0.0                                                 | 0.000 | 0.05              |
| 0.1                                              | 0.000 | 0.05              | 0.1                                                 | 0.000 | 0.05              |
| 0.2                                              | 0.001 | 0.05              | 0.2                                                 | 0.001 | 0.05              |
| 0.3                                              | 0.001 | 0.05              | 0.3                                                 | 0.001 | 0.05              |
| 0.4                                              | 0.001 | 0.06              | 0.4                                                 | 0.001 | 0.06              |
| 0.5                                              | 0.002 | 0.06              | 0.5                                                 | 0.002 | 0.06              |
| 0.6                                              | 0.002 | 0.06              | 0.6                                                 | 0.002 | 0.06              |
| 0.7                                              | 0.002 | 0.07              | 0.7                                                 | 0.002 | 0.07              |
| 0.8                                              | 0.003 | 0.07              | 0.8                                                 | 0.003 | 0.07              |
| 0.9                                              | 0.003 | 0.08              | 0.9                                                 | 0.003 | 0.08              |
| 1.0                                              | 0.003 | 0.08              | 1.0                                                 | 0.003 | 0.08              |

S4 Table: Two-step Mendelian randomisation analyses for childhood and adult body size onto potential mediators and potential mediators onto fracture risk in later life and estimated bone mineral density

| Exposure*           | Mediator/Outcome | nSNPs** | Beta  | Standard Error | P value | Odds Ratio | Lower CI*** | Upper CI*** | Mendelian Randomization (MR) | Method                    | Sex    |
|---------------------|------------------|---------|-------|----------------|---------|------------|-------------|-------------|------------------------------|---------------------------|--------|
| Childhood body size | eBMD             | 313     | 0.26  | 0.03           | 3E-16   | --         | 0.20        | 0.33        | Univariable MR               | Inverse variance weighted | All    |
| Childhood body size | eBMD             | 313     | 0.25  | 0.03           | 7E-21   | --         | 0.20        | 0.30        | Univariable MR               | Weighted median           | All    |
| Childhood body size | eBMD             | 313     | 0.36  | 0.07           | 1E-06   | --         | 0.21        | 0.50        | Univariable MR               | MR Egger                  | All    |
| Childhood body size | eBMD             | 142     | 0.18  | 0.04           | 7E-06   | --         | 0.10        | 0.26        | Univariable MR               | Inverse variance weighted | Female |
| Childhood body size | eBMD             | 142     | 0.22  | 0.04           | 5E-10   | --         | 0.15        | 0.29        | Univariable MR               | Weighted median           | Female |
| Childhood body size | eBMD             | 142     | 0.27  | 0.09           | 4E-03   | --         | 0.09        | 0.44        | Univariable MR               | MR Egger                  | Female |
| Childhood body size | eBMD             | 69      | 0.36  | 0.06           | 3E-08   | --         | 0.23        | 0.49        | Univariable MR               | Inverse variance weighted | Male   |
| Childhood body size | eBMD             | 69      | 0.37  | 0.05           | 6E-13   | --         | 0.27        | 0.47        | Univariable MR               | Weighted median           | Male   |
| Childhood body size | eBMD             | 69      | 0.44  | 0.15           | 4E-03   | --         | 0.15        | 0.73        | Univariable MR               | MR Egger                  | Male   |
| Adult body size     | eBMD             | 580     | 0.20  | 0.02           | 1E-17   | --         | 0.15        | 0.25        | Univariable MR               | Inverse variance weighted | All    |
| Adult body size     | eBMD             | 580     | 0.22  | 0.02           | 1E-29   | --         | 0.18        | 0.26        | Univariable MR               | Weighted median           | All    |
| Adult body size     | eBMD             | 580     | 0.24  | 0.07           | 3E-04   | --         | 0.11        | 0.37        | Univariable MR               | MR Egger                  | All    |
| Adult body size     | eBMD             | 221     | 0.16  | 0.04           | 9E-06   | --         | 0.09        | 0.24        | Univariable MR               | Inverse variance weighted | Female |
| Adult body size     | eBMD             | 221     | 0.16  | 0.03           | 3E-07   | --         | 0.10        | 0.23        | Univariable MR               | Weighted median           | Female |
| Adult body size     | eBMD             | 221     | 0.22  | 0.11           | 5E-02   | --         | 0.00        | 0.44        | Univariable MR               | MR Egger                  | Female |
| Adult body size     | eBMD             | 168     | 0.34  | 0.04           | 4E-14   | --         | 0.25        | 0.42        | Univariable MR               | Inverse variance weighted | Male   |
| Adult body size     | eBMD             | 168     | 0.37  | 0.05           | 7E-16   | --         | 0.28        | 0.45        | Univariable MR               | Weighted median           | Male   |
| Adult body size     | eBMD             | 168     | 0.52  | 0.13           | 2E-04   | --         | 0.26        | 0.78        | Univariable MR               | MR Egger                  | Male   |
| Childhood body size | Calcium          | 313     | -0.10 | 0.02           | 6E-07   | --         | -0.15       | -0.06       | Univariable MR               | Inverse variance weighted | All    |
| Childhood body size | Calcium          | 313     | -0.09 | 0.02           | 1E-05   | --         | -0.13       | -0.05       | Univariable MR               | Weighted median           | All    |
| Childhood body size | Calcium          | 313     | -0.11 | 0.05           | 2E-02   | --         | -0.20       | -0.02       | Univariable MR               | MR Egger                  | All    |
| Childhood body size | Vitamin D        | 313     | -0.07 | 0.02           | 5E-05   | --         | -0.10       | -0.04       | Univariable MR               | Inverse variance weighted | All    |
| Childhood body size | Vitamin D        | 313     | -0.06 | 0.02           | 2E-03   | --         | -0.10       | -0.02       | Univariable MR               | Weighted median           | All    |
| Childhood body size | Vitamin D        | 313     | -0.11 | 0.04           | 3E-03   | --         | -0.19       | -0.04       | Univariable MR               | MR Egger                  | All    |
| Adult body size     | Calcium          | 580     | -0.05 | 0.02           | 6E-03   | --         | -0.08       | -0.01       | Univariable MR               | Inverse variance weighted | All    |
| Adult body size     | Calcium          | 580     | -0.07 | 0.02           | 6E-05   | --         | -0.10       | -0.03       | Univariable MR               | Weighted median           | All    |
| Adult body size     | Calcium          | 580     | -0.09 | 0.05           | 7E-02   | --         | -0.20       | 0.01        | Univariable MR               | MR Egger                  | All    |

|                     |           |     |       |      |        |      |       |       |                  |                           |        |
|---------------------|-----------|-----|-------|------|--------|------|-------|-------|------------------|---------------------------|--------|
| Adult body size     | Vitamin D | 580 | -0.18 | 0.01 | 1E-37  | --   | -0.21 | -0.15 | Univariable MR   | Inverse variance weighted | All    |
| Adult body size     | Vitamin D | 580 | -0.19 | 0.02 | 3E-32  | --   | -0.22 | -0.16 | Univariable MR   | Weighted median           | All    |
| Adult body size     | Vitamin D | 580 | -0.18 | 0.04 | 2E-05  | --   | -0.26 | -0.10 | Univariable MR   | MR Egger                  | All    |
| Childhood body size | eBMD      | 267 | 0.20  | 0.04 | 3E-07  | --   | 0.12  | 0.27  | Multivariable MR | Inverse variance weighted | All    |
| Adult body size     | eBMD      | 535 | 0.09  | 0.03 | 8E-03  | --   | 0.02  | 0.15  | Multivariable MR | Inverse variance weighted | All    |
| Childhood body size | eBMD      | 132 | 0.21  | 0.04 | 5E-07  | --   | 0.13  | 0.29  | Multivariable MR | Inverse variance weighted | Female |
| Adult body size     | eBMD      | 202 | 0.04  | 0.04 | 3E-01  | --   | -0.03 | 0.12  | Multivariable MR | Inverse variance weighted | Female |
| Childhood body size | eBMD      | 58  | 0.20  | 0.07 | 8E-03  | --   | 0.05  | 0.35  | Multivariable MR | Inverse variance weighted | Male   |
| Adult body size     | eBMD      | 161 | 0.14  | 0.06 | 3E-02  | --   | 0.02  | 0.27  | Multivariable MR | Inverse variance weighted | Male   |
| Childhood body size | Calcium   | 267 | -0.11 | 0.03 | 1E-04  | --   | -0.17 | -0.05 | Multivariable MR | Inverse variance weighted | All    |
| Adult body size     | Calcium   | 535 | 0.01  | 0.03 | 6E-01  | --   | -0.04 | 0.06  | Multivariable MR | Inverse variance weighted | All    |
| Childhood body size | Vitamin D | 267 | 0.07  | 0.02 | 3E-03  | --   | 0.02  | 0.11  | Multivariable MR | Inverse variance weighted | All    |
| Adult body size     | Vitamin D | 535 | -0.22 | 0.02 | 4E-30  | --   | -0.26 | -0.18 | Multivariable MR | Inverse variance weighted | All    |
| eBMD                | Fractures | 548 | -0.48 | 0.02 | 5E-150 | 0.62 | 0.60  | 0.64  | Univariable MR   | Inverse variance weighted | All    |
| eBMD                | Fractures | 548 | -0.48 | 0.02 | 3E-91  | 0.62 | 0.59  | 0.65  | Univariable MR   | Weighted median           | All    |
| eBMD                | Fractures | 548 | -0.54 | 0.04 | 9E-41  | 0.58 | 0.54  | 0.63  | Univariable MR   | MR Egger                  | All    |
| eBMD                | Fractures | 323 | -0.51 | 0.02 | 2E-112 | 0.60 | 0.57  | 0.63  | Univariable MR   | Inverse variance weighted | Female |
| eBMD                | Fractures | 323 | -0.56 | 0.03 | 9E-77  | 0.57 | 0.54  | 0.61  | Univariable MR   | Weighted median           | Female |
| eBMD                | Fractures | 323 | -0.59 | 0.05 | 1E-29  | 0.55 | 0.51  | 0.61  | Univariable MR   | MR Egger                  | Female |
| eBMD                | Fractures | 206 | -0.37 | 0.03 | 5E-40  | 0.69 | 0.65  | 0.73  | Univariable MR   | Inverse variance weighted | Male   |
| eBMD                | Fractures | 206 | -0.47 | 0.04 | 1E-38  | 0.63 | 0.58  | 0.67  | Univariable MR   | Weighted median           | Male   |
| eBMD                | Fractures | 206 | -0.47 | 0.06 | 2E-13  | 0.62 | 0.55  | 0.70  | Univariable MR   | MR Egger                  | Male   |
| Calcium             | Fractures | 355 | -0.01 | 0.02 | 8E-01  | 0.99 | 0.95  | 1.04  | Univariable MR   | Inverse variance weighted | All    |
| Calcium             | Fractures | 355 | 0.01  | 0.03 | 7E-01  | 1.01 | 0.95  | 1.08  | Univariable MR   | Weighted median           | All    |
| Calcium             | Fractures | 355 | 0.01  | 0.05 | 8E-01  | 1.01 | 0.92  | 1.10  | Univariable MR   | MR Egger                  | All    |
| Vitamin D           | Fractures | 131 | 0.02  | 0.03 | 5E-01  | 1.02 | 0.96  | 1.09  | Univariable MR   | Inverse variance weighted | All    |
| Vitamin D           | Fractures | 131 | -0.02 | 0.05 | 8E-01  | 0.98 | 0.89  | 1.09  | Univariable MR   | Weighted median           | All    |
| Vitamin D           | Fractures | 131 | 0.00  | 0.05 | 1E+00  | 1.00 | 0.91  | 1.10  | Univariable MR   | MR Egger                  | All    |
| Calcium             | eBMD      | 355 | -0.04 | 0.02 | 4E-02  |      | -0.07 | 0.00  | Univariable MR   | Inverse variance weighted | All    |
| Calcium             | eBMD      | 355 | -0.04 | 0.02 | 2E-02  |      | -0.06 | -0.01 | Univariable MR   | Weighted median           | All    |
| Calcium             | eBMD      | 355 | -0.02 | 0.03 | 5E-01  |      | -0.09 | 0.05  | Univariable MR   | MR Egger                  | All    |
| Vitamin D           | eBMD      | 131 | -0.01 | 0.02 | 6E-01  |      | -0.06 | 0.03  | Univariable MR   | Inverse variance weighted | All    |

|           |      |     |       |      |       |  |       |       |                |                 |     |
|-----------|------|-----|-------|------|-------|--|-------|-------|----------------|-----------------|-----|
| Vitamin D | eBMD | 131 | -0.04 | 0.02 | 1E-02 |  | -0.07 | -0.01 | Univariable MR | Weighted median | All |
| Vitamin D | eBMD | 131 | -0.02 | 0.03 | 5E-01 |  | -0.09 | 0.05  | Univariable MR | MR Egger        | All |

\* Results represent an increase in the exposure variable

\*\* Number of single-nucleotide polymorphisms (SNPs)

\*\*\* 95% Confidence Interval

S5 Table: Two-step Mendelian randomisation analyses for childhood and adult body size onto sex-specific mediators and mediators onto fracture risk in later life and estimated bone mineral density

| Exposure*           | Mediator/Outcome          | nSNPs** | Beta  | Standard Error | P value | Odds Ratio | Lower CI*** | Upper CI*** | Mendelian Randomization (MR) | Method                    | Sex    |
|---------------------|---------------------------|---------|-------|----------------|---------|------------|-------------|-------------|------------------------------|---------------------------|--------|
| Childhood body size | Bioavailable testosterone | 142     | 0.10  | 0.03           | 1E-03   | --         | 0.04        | 0.16        | Univariable MR               | Inverse variance weighted | Female |
| Childhood body size | Bioavailable testosterone | 142     | 0.09  | 0.03           | 5E-03   | --         | 0.03        | 0.15        | Univariable MR               | Weighted median           | Female |
| Childhood body size | Bioavailable testosterone | 142     | 0.15  | 0.07           | 4E-02   | --         | 0.01        | 0.29        | Univariable MR               | MR Egger                  | Female |
| Childhood body size | Bioavailable testosterone | 69      | -0.28 | 0.04           | 7E-13   | --         | -0.35       | -0.20       | Univariable MR               | Inverse variance weighted | Male   |
| Childhood body size | Bioavailable testosterone | 69      | -0.24 | 0.04           | 9E-11   | --         | -0.31       | -0.16       | Univariable MR               | Weighted median           | Male   |
| Childhood body size | Bioavailable testosterone | 69      | -0.25 | 0.09           | 6E-03   | --         | -0.42       | -0.08       | Univariable MR               | MR Egger                  | Male   |
| Childhood body size | Total testosterone        | 142     | 0.01  | 0.01           | 3E-01   | --         | -0.01       | 0.04        | Univariable MR               | Inverse variance weighted | Female |
| Childhood body size | Total testosterone        | 142     | 0.02  | 0.02           | 4E-01   | --         | -0.02       | 0.05        | Univariable MR               | Weighted median           | Female |
| Childhood body size | Total testosterone        | 142     | -0.01 | 0.03           | 8E-01   | --         | -0.07       | 0.05        | Univariable MR               | MR Egger                  | Female |
| Childhood body size | Total testosterone        | 69      | -1.21 | 0.21           | 2E-08   | --         | -1.62       | -0.79       | Univariable MR               | Inverse variance weighted | Male   |
| Childhood body size | Total testosterone        | 69      | -1.19 | 0.15           | 1E-14   | --         | -1.49       | -0.89       | Univariable MR               | Weighted median           | Male   |
| Childhood body size | Total testosterone        | 69      | -0.86 | 0.48           | 8E-02   | --         | -0.95       | -0.78       | Univariable MR               | MR Egger                  | Male   |
| Childhood body size | SHBG                      | 142     | -0.16 | 0.04           | 3E-04   | --         | -0.25       | -0.07       | Univariable MR               | Inverse variance weighted | Female |
| Childhood body size | SHBG                      | 142     | -0.11 | 0.03           | 7E-04   | --         | -0.17       | -0.05       | Univariable MR               | Weighted median           | Female |
| Childhood body size | SHBG                      | 142     | -0.28 | 0.10           | 7E-03   | --         | -0.48       | -0.08       | Univariable MR               | MR Egger                  | Female |
| Childhood body size | SHBG                      | 69      | -0.18 | 0.07           | 2E-02   | --         | -0.32       | -0.03       | Univariable MR               | Inverse variance weighted | Male   |
| Childhood body size | SHBG                      | 69      | -0.13 | 0.04           | 2E-03   | --         | -0.20       | -0.05       | Univariable MR               | Weighted median           | Male   |
| Childhood body size | SHBG                      | 69      | -0.10 | 0.17           | 6E-01   | --         | -0.42       | 0.23        | Univariable MR               | MR Egger                  | Male   |
| Adult body size     | Bioavailable testosterone | 221     | 0.41  | 0.03           | 5E-45   | --         | 0.35        | 0.47        | Univariable MR               | Inverse variance weighted | Female |
| Adult body size     | Bioavailable testosterone | 221     | 0.35  | 0.03           | 2E-32   | --         | 0.29        | 0.41        | Univariable MR               | Weighted median           | Female |
| Adult body size     | Bioavailable testosterone | 221     | 0.16  | 0.09           | 7E-02   | --         | -0.01       | 0.33        | Univariable MR               | MR Egger                  | Female |
| Adult body size     | Bioavailable testosterone | 168     | -0.22 | 0.03           | 8E-13   | --         | -0.27       | -0.16       | Univariable MR               | Inverse variance weighted | Male   |
| Adult body size     | Bioavailable testosterone | 168     | -0.24 | 0.03           | 1E-14   | --         | -0.30       | -0.18       | Univariable MR               | Weighted median           | Male   |
| Adult body size     | Bioavailable testosterone | 168     | -0.35 | 0.09           | 2E-04   | --         | -0.53       | -0.17       | Univariable MR               | MR Egger                  | Male   |
| Adult body size     | Total testosterone        | 221     | 0.08  | 0.02           | 4E-06   | --         | 0.04        | 0.11        | Univariable MR               | Inverse variance weighted | Female |
| Adult body size     | Total testosterone        | 221     | 0.05  | 0.02           | 1E-02   | --         | 0.01        | 0.08        | Univariable MR               | Weighted median           | Female |
| Adult body size     | Total testosterone        | 221     | 0.03  | 0.05           | 6E-01   | --         | -0.07       | 0.13        | Univariable MR               | MR Egger                  | Female |



|                           |                             |     |       |      |       |      |       |       |                  |                           |        |
|---------------------------|-----------------------------|-----|-------|------|-------|------|-------|-------|------------------|---------------------------|--------|
| Adult body size           | Total testosterone          | 168 | -1.66 | 0.11 | 2E-51 | --   | -1.87 | -1.44 | Univariable MR   | Inverse variance weighted | Male   |
| Adult body size           | Total testosterone          | 168 | -1.56 | 0.12 | 2E-38 | --   | -1.80 | -1.33 | Univariable MR   | Weighted median           | Male   |
| Adult body size           | Total testosterone          | 168 | -1.37 | 0.33 | 6E-05 | --   | -2.02 | -0.72 | Univariable MR   | MR Egger                  | Male   |
| Adult body size           | SHBG                        | 221 | -0.56 | 0.04 | 5E-54 | --   | -0.64 | -0.49 | Univariable MR   | Inverse variance weighted | Female |
| Adult body size           | SHBG                        | 221 | -0.51 | 0.03 | 6E-67 | --   | -0.57 | -0.45 | Univariable MR   | Weighted median           | Female |
| Adult body size           | SHBG                        | 221 | -0.27 | 0.11 | 1E-02 | --   | -0.49 | 0.06  | Univariable MR   | MR Egger                  | Female |
| Adult body size           | SHBG                        | 168 | -0.42 | 0.04 | 3E-29 | --   | -0.49 | -0.34 | Univariable MR   | Inverse variance weighted | Male   |
| Adult body size           | SHBG                        | 168 | -0.38 | 0.03 | 3E-31 | --   | -0.45 | -0.32 | Univariable MR   | Weighted median           | Male   |
| Adult body size           | SHBG                        | 168 | -0.18 | 0.11 | 1E-01 | --   | -0.40 | 0.04  | Univariable MR   | MR Egger                  | Male   |
| Childhood body size       | Bioavailable testosterone   | 132 | -0.20 | 0.04 | 2E-06 | --   | -0.28 | -0.12 | Multivariable MR | Inverse variance weighted | Female |
| Adult body size           | Bioavailable testosterone   | 202 | 0.51  | 0.04 | 7E-38 | --   | 0.43  | 0.59  | Multivariable MR | Inverse variance weighted | Female |
| Childhood body size       | Bioavailable testosterone   | 58  | -0.18 | 0.05 | 8E-04 | --   | -0.28 | -0.07 | Multivariable MR | Inverse variance weighted | Male   |
| Adult body size           | Bioavailable testosterone   | 161 | -0.11 | 0.04 | 1E-02 | --   | -0.20 | -0.02 | Multivariable MR | Inverse variance weighted | Male   |
| Childhood body size       | Total testosterone          | 132 | -0.04 | 0.02 | 6E-02 | --   | -0.08 | 0.00  | Multivariable MR | Inverse variance weighted | Female |
| Adult body size           | Total testosterone          | 202 | 0.09  | 0.02 | 2E-06 | --   | 0.06  | 0.13  | Multivariable MR | Inverse variance weighted | Female |
| Childhood body size       | Total testosterone          | 58  | 0.01  | 0.23 | 1E+00 | --   | -0.45 | 0.47  | Multivariable MR | Inverse variance weighted | Male   |
| Adult body size           | Total testosterone          | 161 | -1.68 | 0.20 | 3E-17 | --   | -2.07 | -1.29 | Multivariable MR | Inverse variance weighted | Male   |
| Childhood body size       | SHBG                        | 132 | 0.25  | 0.06 | 1E-05 | --   | 0.14  | 0.35  | Multivariable MR | Inverse variance weighted | Female |
| Adult body size           | SHBG                        | 202 | -0.69 | 0.05 | 4E-40 | --   | -0.79 | -0.59 | Multivariable MR | Inverse variance weighted | Female |
| Childhood body size       | SHBG                        | 58  | 0.21  | 0.08 | 1E-02 | --   | 0.05  | 0.37  | Multivariable MR | Inverse variance weighted | Male   |
| Adult body size           | SHBG                        | 161 | -0.55 | 0.07 | 4E-15 | --   | -0.69 | -0.41 | Multivariable MR | Inverse variance weighted | Male   |
| Bioavailable testosterone | Fracture risk in later life | 143 | -0.10 | 0.03 | 1E-03 | 0.91 | 0.86  | 0.96  | Univariable MR   | Inverse variance weighted | Female |
| Bioavailable testosterone | Fracture risk in later life | 143 | -0.10 | 0.05 | 2E-02 | 0.90 | 0.82  | 0.98  | Univariable MR   | Weighted median           | Female |
| Bioavailable testosterone | Fracture risk in later life | 143 | -0.16 | 0.06 | 9E-03 | 0.85 | 0.75  | 0.96  | Univariable MR   | MR Egger                  | Female |
| Bioavailable testosterone | Fracture risk in later life | 101 | -0.16 | 0.04 | 7E-05 | 0.85 | 0.79  | 0.92  | Univariable MR   | Inverse variance weighted | Male   |
| Bioavailable testosterone | Fracture risk in later life | 101 | -0.21 | 0.06 | 6E-04 | 0.81 | 0.72  | 0.91  | Univariable MR   | Weighted median           | Male   |
| Bioavailable testosterone | Fracture risk in later life | 101 | -0.19 | 0.07 | 9E-03 | 0.83 | 0.72  | 0.95  | Univariable MR   | MR Egger                  | Male   |
| Total testosterone        | Fracture risk in later life | 92  | -0.15 | 0.07 | 3E-02 | 0.86 | 0.76  | 0.98  | Univariable MR   | Inverse variance weighted | Female |
| Total testosterone        | Fracture risk in later life | 92  | -0.33 | 0.10 | 1E-03 | 0.72 | 0.59  | 0.88  | Univariable MR   | Weighted median           | Female |
| Total testosterone        | Fracture risk in later life | 92  | -0.31 | 0.12 | 9E-03 | 0.74 | 0.59  | 0.92  | Univariable MR   | MR Egger                  | Female |
| Total testosterone        | Fracture risk in later life | 186 | -0.02 | 0.01 | 4E-02 | 0.98 | 0.97  | 1.00  | Univariable MR   | Inverse variance weighted | Male   |
| Total testosterone        | Fracture risk in later life | 186 | -0.01 | 0.01 | 3E-01 | 0.99 | 0.97  | 1.00  | Univariable MR   | Weighted median           | Male   |

|                           |                             |     |       |      |       |      |       |       |                |                           |        |
|---------------------------|-----------------------------|-----|-------|------|-------|------|-------|-------|----------------|---------------------------|--------|
| Total testosterone        | Fracture risk in later life | 186 | -0.02 | 0.01 | 2E-01 | 0.98 | 0.95  | 1.01  | Univariable MR | MR Egger                  | Male   |
| SHBG                      | Fracture risk in later life | 261 | 0.09  | 0.02 | 1E-04 | 1.10 | 1.05  | 1.15  | Univariable MR | Inverse variance weighted | Female |
| SHBG                      | Fracture risk in later life | 261 | 0.08  | 0.03 | 2E-02 | 1.08 | 1.01  | 1.16  | Univariable MR | Weighted median           | Female |
| SHBG                      | Fracture risk in later life | 261 | 0.02  | 0.04 | 7E-01 | 1.02 | 0.93  | 1.10  | Univariable MR | MR Egger                  | Female |
| SHBG                      | Fracture risk in later life | 300 | 0.01  | 0.02 | 6E-01 | 1.01 | 0.97  | 1.06  | Univariable MR | Inverse variance weighted | Male   |
| SHBG                      | Fracture risk in later life | 300 | 0.02  | 0.04 | 7E-01 | 1.02 | 0.94  | 1.10  | Univariable MR | Weighted median           | Male   |
| SHBG                      | Fracture risk in later life | 300 | -0.01 | 0.03 | 9E-01 | 0.99 | 0.93  | 1.06  | Univariable MR | MR Egger                  | Male   |
| Bioavailable testosterone | eBMD                        | 143 | 0.17  | 0.02 | 3E-12 | --   | 0.12  | 0.21  | Univariable MR | Inverse variance weighted | Female |
| Bioavailable testosterone | eBMD                        | 143 | 0.12  | 0.02 | 2E-08 | --   | 0.08  | 0.16  | Univariable MR | Weighted median           | Female |
| Bioavailable testosterone | eBMD                        | 143 | 0.18  | 0.05 | 2E-04 | --   | 0.09  | 0.28  | Univariable MR | MR Egger                  | Female |
| Bioavailable testosterone | eBMD                        | 101 | 0.20  | 0.03 | 2E-13 | --   | 0.15  | 0.25  | Univariable MR | Inverse variance weighted | Male   |
| Bioavailable testosterone | eBMD                        | 101 | 0.24  | 0.03 | 3E-18 | --   | 0.19  | 0.29  | Univariable MR | Weighted median           | Male   |
| Bioavailable testosterone | eBMD                        | 101 | 0.22  | 0.05 | 2E-05 | --   | 0.12  | 0.31  | Univariable MR | MR Egger                  | Male   |
| Total testosterone        | eBMD                        | 92  | 0.17  | 0.05 | 2E-04 | --   | 0.08  | 0.26  | Univariable MR | Inverse variance weighted | Female |
| Total testosterone        | eBMD                        | 92  | 0.11  | 0.04 | 2E-02 | --   | 0.02  | 0.19  | Univariable MR | Weighted median           | Female |
| Total testosterone        | eBMD                        | 92  | 0.18  | 0.08 | 2E-02 | --   | 0.03  | 0.34  | Univariable MR | MR Egger                  | Female |
| Total testosterone        | eBMD                        | 186 | 0.01  | 0.01 | 1E-01 | --   | 0.00  | 0.02  | Univariable MR | Inverse variance weighted | Male   |
| Total testosterone        | eBMD                        | 186 | 0.01  | 0.01 | 2E-02 | --   | 0.00  | 0.02  | Univariable MR | Weighted median           | Male   |
| Total testosterone        | eBMD                        | 186 | 0.02  | 0.01 | 7E-02 | --   | 0.00  | 0.04  | Univariable MR | MR Egger                  | Male   |
| SHBG                      | eBMD                        | 261 | -0.14 | 0.02 | 2E-17 | --   | -0.18 | -0.11 | Univariable MR | Inverse variance weighted | Female |
| SHBG                      | eBMD                        | 261 | -0.09 | 0.02 | 2E-09 | --   | -0.12 | -0.06 | Univariable MR | Weighted median           | Female |
| SHBG                      | eBMD                        | 261 | -0.10 | 0.03 | 2E-03 | --   | -0.15 | -0.04 | Univariable MR | MR Egger                  | Female |
| SHBG                      | eBMD                        | 300 | -0.05 | 0.01 | 4E-04 | --   | -0.08 | -0.02 | Univariable MR | Inverse variance weighted | Male   |
| SHBG                      | eBMD                        | 300 | -0.03 | 0.02 | 3E-02 | --   | -0.06 | 0.00  | Univariable MR | Weighted median           | Male   |
| SHBG                      | eBMD                        | 300 | -0.02 | 0.02 | 4E-01 | --   | -0.06 | 0.02  | Univariable MR | MR Egger                  | Male   |

\* Results represent an increase in the exposure variable

\*\* Number of single-nucleotide polymorphisms (SNPs)

\*\*\* 95% Confidence Interval

S6 Table: Univariable and multivariable Mendelian randomisation analyses for birthweight, childhood and adult body size onto fracture risk in later life and estimated bone mineral density

| Exposure*           | Outcome                     | nSNPs** | Beta  | Standard Error | P value | Odds ratio (95% confidence interval) | Mendelian Randomization (MR) |
|---------------------|-----------------------------|---------|-------|----------------|---------|--------------------------------------|------------------------------|
| Birthweight         | Fracture risk in later life | 174     | 0.08  | 0.04           | 3E-02   | 1.08 (1.01, 1.16)                    | Univariable MR               |
| Childhood body size | Fracture risk in later life | 313     | -0.12 | 0.04           | 5E-03   | 0.89 (0.82, 0.96)                    | Univariable MR               |
| Adult body size     | Fracture risk in later life | 580     | 0.08  | 0.03           | 2E-02   | 1.08 (1.01, 1.16)                    | Univariable MR               |
| Birthweight         | eBMD                        | 174     | -0.08 | 0.03           | 1E-02   | (-0.14, 0.02)                        | Univariable MR               |
| Childhood body size | eBMD                        | 313     | 0.26  | 0.03           | 3E-16   | (0.20, 0.33)                         | Univariable MR               |
| Adult body size     | eBMD                        | 580     | 0.2   | 0.02           | 1E-17   | (0.15, 0.25)                         | Univariable MR               |
| Birthweight         | Fracture risk in later life | 148     | 0.1   | 0.03           | 3E-03   | 1.10 (1.03, 1.17)                    | Multivariable MR             |
| Childhood body size | Fracture risk in later life | 203     | -0.25 | 0.06           | 7E-05   | 0.78 (0.69, 0.88)                    | Multivariable MR             |
| Adult body size     | Fracture risk in later life | 396     | 0.19  | 0.05           | 3E-04   | 1.21 (1.09, 1.35)                    | Multivariable MR             |
| Birthweight         | eBMD                        | 148     | -0.11 | 0.02           | 1E-05   | (-0.16, -0.06)                       | Multivariable MR             |
| Childhood body size | eBMD                        | 203     | 0.21  | 0.05           | 2E-05   | (0.11, 0.30)                         | Multivariable MR             |
| Adult body size     | eBMD                        | 396     | 0.11  | 0.04           | 1E-02   | (0.02, 0.19)                         | Multivariable MR             |

\* Results represent an increase in the exposure variable

\*\* Number of single-nucleotide polymorphisms (SNPs)

S7 Table: Univariable and multivariable mendelian randomisation analyses for childhood and adult body size onto fat free mass index and fat mass index in adulthood

| Exposure*           | Outcome             | nSNPs** | Beta  | Standard Error | P value | Lower CI*** | Upper CI*** | Mendelian Randomization (MR) | Method                    | Sex    |
|---------------------|---------------------|---------|-------|----------------|---------|-------------|-------------|------------------------------|---------------------------|--------|
| Childhood body size | Fat free mass index | 313     | 0.74  | 0.02           | 3E-195  | 0.69        | 0.79        | Univariable MR               | Inverse variance weighted | All    |
| Childhood body size | Fat free mass index | 313     | 0.61  | 0.02           | 9E-191  | 0.57        | 0.65        | Univariable MR               | Weighted Median           | All    |
| Childhood body size | Fat free mass index | 313     | 0.82  | 0.06           | 1E-37   | 0.71        | 0.93        | Univariable MR               | MR-Egger                  | All    |
| Adult body size     | Fat free mass index | 580     | 1.00  | 0.01           | 1E-300  | 0.98        | 1.02        | Univariable MR               | Inverse variance weighted | All    |
| Adult body size     | Fat free mass index | 580     | 0.95  | 0.01           | 1E-300  | 0.93        | 0.98        | Univariable MR               | Weighted Median           | All    |
| Adult body size     | Fat free mass index | 580     | 1.09  | 0.03           | 1E-167  | 1.04        | 1.14        | Univariable MR               | MR-Egger                  | All    |
| Childhood body size | Fat free mass index | 267     | 0.18  | 0.02           | 8E-23   | 0.14        | 0.21        | Multivariable MR             | Inverse variance weighted | All    |
| Adult body size     | Fat free mass index | 535     | 0.91  | 0.02           | 1E-300  | 0.88        | 0.94        | Multivariable MR             | Inverse variance weighted | All    |
| Childhood body size | Fat mass index      | 313     | 0.78  | 0.03           | 7E-154  | 0.72        | 0.83        | Univariable MR               | Inverse variance weighted | All    |
| Childhood body size | Fat mass index      | 313     | 0.75  | 0.02           | 2E-219  | 0.70        | 0.80        | Univariable MR               | Weighted Median           | All    |
| Childhood body size | Fat mass index      | 313     | 0.99  | 0.06           | 1E-39   | 0.86        | 1.12        | Univariable MR               | MR-Egger                  | All    |
| Adult body size     | Fat mass index      | 580     | 1.30  | 0.01           | 1E-300  | 1.29        | 1.32        | Univariable MR               | Inverse variance weighted | All    |
| Adult body size     | Fat mass index      | 580     | 1.27  | 0.02           | 1E-300  | 1.24        | 1.31        | Univariable MR               | Weighted Median           | All    |
| Adult body size     | Fat mass index      | 580     | 1.30  | 0.02           | 2E-248  | 1.26        | 1.35        | Univariable MR               | MR-Egger                  | All    |
| Childhood body size | Fat mass index      | 267     | -0.05 | 0.01           | 5E-04   | -0.08       | -0.02       | Multivariable MR             | Inverse variance weighted | All    |
| Adult body size     | Fat mass index      | 535     | 1.33  | 0.01           | 1E-300  | 1.30        | 1.35        | Multivariable MR             | Inverse variance weighted | All    |
| Childhood body size | Fat free mass index | 142     | 0.63  | 0.03           | 2E-90   | 0.57        | 0.69        | Univariable MR               | Inverse variance weighted | Female |
| Childhood body size | Fat free mass index | 142     | 0.52  | 0.02           | 6E-119  | 0.48        | 0.56        | Univariable MR               | Weighted Median           | Female |
| Childhood body size | Fat free mass index | 142     | 0.78  | 0.07           | 5E-21   | 0.64        | 0.91        | Univariable MR               | MR-Egger                  | Female |

|                     |                     |     |      |      |        |      |      |                  |                           |        |
|---------------------|---------------------|-----|------|------|--------|------|------|------------------|---------------------------|--------|
| Adult body size     | Fat free mass index | 221 | 0.84 | 0.02 | 1E-300 | 0.81 | 0.88 | Univariable MR   | Inverse variance weighted | Female |
| Adult body size     | Fat free mass index | 221 | 0.75 | 0.02 | 1E-300 | 0.71 | 0.78 | Univariable MR   | Weighted Median           | Female |
| Adult body size     | Fat free mass index | 221 | 1.06 | 0.05 | 2E-54  | 0.96 | 1.16 | Univariable MR   | MR-Egger                  | Female |
| Childhood body size | Fat free mass index | 132 | 0.19 | 0.02 | 2E-15  | 0.14 | 0.23 | Multivariable MR | Inverse variance weighted | Female |
| Adult body size     | Fat free mass index | 202 | 0.75 | 0.02 | 4E-255 | 0.71 | 0.79 | Multivariable MR | Inverse variance weighted | Female |
| Childhood body size | Fat mass index      | 142 | 0.72 | 0.03 | 1E-101 | 0.65 | 0.78 | Univariable MR   | Inverse variance weighted | Female |
| Childhood body size | Fat mass index      | 142 | 0.63 | 0.03 | 3E-123 | 0.58 | 0.69 | Univariable MR   | Weighted Median           | Female |
| Childhood body size | Fat mass index      | 142 | 0.96 | 0.07 | 2E-26  | 0.82 | 1.10 | Univariable MR   | MR-Egger                  | Female |
| Adult body size     | Fat mass index      | 221 | 1.11 | 0.01 | 1E-300 | 1.08 | 1.14 | Univariable MR   | Inverse variance weighted | Female |
| Adult body size     | Fat mass index      | 221 | 1.07 | 0.02 | 1E-300 | 1.02 | 1.11 | Univariable MR   | Weighted Median           | Female |
| Adult body size     | Fat mass index      | 221 | 1.22 | 0.05 | 9E-72  | 1.13 | 1.31 | Univariable MR   | MR-Egger                  | Female |
| Childhood body size | Fat mass index      | 132 | 0.08 | 0.02 | 2E-04  | 0.04 | 0.12 | Multivariable MR | Inverse variance weighted | Female |
| Adult body size     | Fat mass index      | 202 | 1.06 | 0.02 | 1E-300 | 1.03 | 1.10 | Multivariable MR | Inverse variance weighted | Female |
| Childhood body size | Fat free mass index | 69  | 0.81 | 0.04 | 4E-98  | 0.73 | 0.88 | Univariable MR   | Inverse variance weighted | Male   |
| Childhood body size | Fat free mass index | 69  | 0.66 | 0.03 | 1E-82  | 0.59 | 0.72 | Univariable MR   | Weighted Median           | Male   |
| Childhood body size | Fat free mass index | 69  | 0.94 | 0.09 | 1E-16  | 0.77 | 1.11 | Univariable MR   | MR-Egger                  | Male   |
| Adult body size     | Fat free mass index | 168 | 0.94 | 0.02 | 1E-300 | 0.89 | 0.98 | Univariable MR   | Inverse variance weighted | Male   |
| Adult body size     | Fat free mass index | 168 | 0.83 | 0.02 | 1E-300 | 0.79 | 0.87 | Univariable MR   | Weighted Median           | Male   |
| Adult body size     | Fat free mass index | 168 | 1.16 | 0.06 | 6E-43  | 1.04 | 1.28 | Univariable MR   | MR-Egger                  | Male   |
| Childhood body size | Fat free mass index | 58  | 0.28 | 0.03 | 1E-17  | 0.21 | 0.34 | Multivariable MR | Inverse variance weighted | Male   |
| Adult body size     | Fat free mass index | 161 | 0.77 | 0.03 | 2E-171 | 0.71 | 0.82 | Multivariable MR | Inverse variance weighted | Male   |

|                     |                |     |      |      |        |      |      |                  |                           |      |
|---------------------|----------------|-----|------|------|--------|------|------|------------------|---------------------------|------|
| Childhood body size | Fat mass index | 69  | 0.91 | 0.05 | 6E-72  | 0.81 | 1.01 | Univariable MR   | Inverse variance weighted | Male |
| Childhood body size | Fat mass index | 69  | 0.81 | 0.04 | 2E-80  | 0.73 | 0.89 | Univariable MR   | Weighted Median           | Male |
| Childhood body size | Fat mass index | 69  | 1.10 | 0.11 | 2E-14  | 0.88 | 1.32 | Univariable MR   | MR-Egger                  | Male |
| Adult body size     | Fat mass index | 168 | 1.18 | 0.02 | 1E-300 | 1.14 | 1.22 | Univariable MR   | Inverse variance weighted | Male |
| Adult body size     | Fat mass index | 168 | 1.11 | 0.03 | 1E-300 | 1.06 | 1.17 | Univariable MR   | Weighted Median           | Male |
| Adult body size     | Fat mass index | 168 | 1.26 | 0.06 | 4E-46  | 1.14 | 1.38 | Univariable MR   | MR-Egger                  | Male |
| Childhood body size | Fat mass index | 58  | 0.12 | 0.04 | 9E-04  | 0.05 | 0.19 | Multivariable MR | Inverse variance weighted | Male |
| Adult body size     | Fat mass index | 161 | 1.10 | 0.03 | 1E-276 | 1.04 | 1.17 | Multivariable MR | Inverse variance weighted | Male |

\* Results represent an increase in the exposure variable

\*\* Number of single-nucleotide polymorphisms (SNPs)

\*\*\* 95% Confidence Interval

S8 Table: Univariable and multivariable Mendelian randomisation analyses for childhood and adult body size onto fracture risk in later life, accounting for fat free mass index and fat mass index

| Exposure*           | Accounting for      | nSNPs** | Beta  | Standard Error | P value | Odds Ratio | Lower CI*** | Upper CI*** | Mendelian Randomization (MR) | Method                    | Sex |
|---------------------|---------------------|---------|-------|----------------|---------|------------|-------------|-------------|------------------------------|---------------------------|-----|
| Childhood body size | Fat free mass index | 267     | -0.20 | 0.06           | 8E-04   | 0.82       | 0.73        | 0.92        | Multivariable MR             | Inverse variance weighted | All |
| Adult body size     | Fat free mass index | 374     | 0.13  | 0.05           | 8E-03   | 1.14       | 1.04        | 1.25        | Multivariable MR             | Inverse variance weighted | All |
| Childhood body size | Fat mass index      | 267     | -0.27 | 0.05           | 3E-07   | 0.76       | 0.68        | 0.84        | Multivariable MR             | Inverse variance weighted | All |
| Adult body size     | Fat mass index      | 407     | 0.19  | 0.04           | 1E-07   | 1.20       | 1.12        | 1.29        | Multivariable MR             | Inverse variance weighted | All |

\* Results represent an increase in the exposure variable

\*\* Number of single-nucleotide polymorphisms (SNPs)

\*\*\* 95% Confidence Interval

S9 Table: Univariable and multivariable Mendelian randomisation analyses for childhood and adult body size onto sex (female) to estimate sex-differential participation bias

| Exposure*           | nSNPs** | Beta  | Standard Error | P value | Odds Ratio | Lower CI*** | Upper CI*** | Mendelian Randomization (MR) | Method                    |
|---------------------|---------|-------|----------------|---------|------------|-------------|-------------|------------------------------|---------------------------|
| Childhood body size | 298     | -0.06 | 0.03           | 3E-02   | 0.94       | 0.89        | 0.99        | Univariable MR               | Inverse variance weighted |
| Childhood body size | 298     | -0.10 | 0.04           | 2E-02   | 0.90       | 0.83        | 0.98        | Univariable MR               | Weighted median           |
| Childhood body size | 298     | -0.10 | 0.06           | 1E-01   | 0.91       | 0.80        | 1.03        | Univariable MR               | MR Egger                  |
| Adult body size     | 562     | -0.05 | 0.02           | 5E-02   | 0.96       | 0.91        | 1.00        | Univariable MR               | Inverse variance weighted |
| Adult body size     | 562     | -0.06 | 0.03           | 9E-02   | 0.99       | 0.89        | 1.01        | Univariable MR               | Weighted median           |
| Adult body size     | 562     | -0.09 | 0.07           | 2E-01   | 0.98       | 0.80        | 1.04        | Univariable MR               | MR Egger                  |
| Childhood body size | 256     | -0.02 | 0.04           | 6E-01   | 0.98       | 0.91        | 1.06        | Multivariable MR             | Inverse variance weighted |
| Adult body size     | 520     | -0.03 | 0.03           | 3E-01   | 0.97       | 0.91        | 1.03        | Multivariable MR             | Inverse variance weighted |

\* Results represent an increase in the exposure variable

\*\* Number of single-nucleotide polymorphisms (SNPs)

\*\*\* 95% Confidence Interval



S10 Table: Family-based univariable and multivariable Mendelian randomisation analyses for childhood and adult body size onto fracture risk in later life and estimated bone mineral density

| Model          | Exposure*           | Outcome                     | P value | Odds Ratio | Lower CI** | Upper CI** | Clustered SE | Mendelian Randomization (MR) | Sample size |
|----------------|---------------------|-----------------------------|---------|------------|------------|------------|--------------|------------------------------|-------------|
| Between family | Childhood body size | Fracture risk in later life | 9E-01   | 1.00       | 1.00       | 1.00       | 0.00         | Univariable MR               | 39507       |
| Within family  | Childhood body size | Fracture risk in later life | 6E-01   | 1.00       | 1.00       | 1.01       | 0.00         | Univariable MR               | 39507       |
| Between family | Childhood body size | eBMD                        | 5E-05   | 1.03       | 1.02       | 1.05       | 0.01         | Univariable MR               | 39507       |
| Within family  | Childhood body size | eBMD                        | 5E-05   | 1.05       | 1.02       | 1.07       | 0.01         | Univariable MR               | 39507       |
| Between family | Adult body size     | Fracture risk in later life | 5E-01   | 1.00       | 1.00       | 1.00       | 0.00         | Univariable MR               | 39507       |
| Within family  | Adult body size     | Fracture risk in later life | 2E-01   | 1.00       | 1.00       | 1.01       | 0.00         | Univariable MR               | 39507       |
| Between family | Adult body size     | eBMD                        | 1E-02   | 1.02       | 1.01       | 1.04       | 0.01         | Univariable MR               | 39507       |
| Within family  | Adult body size     | eBMD                        | 2E-05   | 1.05       | 1.02       | 1.07       | 0.01         | Univariable MR               | 39507       |
| Between family | Childhood body size | Fracture risk in later life | 7E-01   | 1.00       | 1.00       | 1.00       | 0.00         | Multivariable MR             | 39507       |
| Within family  | Childhood body size | Fracture risk in later life | 1E+00   | 1.00       | 0.99       | 1.01       | 0.00         | Multivariable MR             | 39507       |
| Between family | Childhood body size | eBMD                        | 8E-04   | 1.03       | 1.01       | 1.04       | 0.01         | Multivariable MR             | 39507       |
| Within family  | Childhood body size | eBMD                        | 7E-03   | 1.03       | 1.01       | 1.06       | 0.01         | Multivariable MR             | 39507       |

\* Results represent an increase in the exposure variable

\*\* 95% Confidence Interval
